# Supplementary material for: Development of Conventional Multiplex PCR: A Rapid Technique for Simultaneous Detection of Soil-Transmitted Helminths
Source: PubMed Central journal article supplement (PMC6789620; doi:10.3390/pathogens8030152), 2019-09-16
Supplement: pathogens-08-00152-s001.pdf [file pathogens-08-00152-s001.pdf]

**Table S1: Blast results for amplicons of the clinical samples and plasmid controls**

| No. | Sample Code | FECT            | PCR      | Sequencing primers | Sequence                            | Max. Score | E. value  | Identity       | Accession number of the maximum scored sequence |
|-----|-------------|-----------------|----------|--------------------|-------------------------------------|------------|-----------|----------------|-------------------------------------------------|
| 1   | AsT7        | plasmid control |          | T7-F, T7-R         | GGTGATGTAATAGCAGTCGGCGGTTTCTTTTTTTT | 399        | 2.00E-107 | 218/219(99%)   | MK849920.1                                      |
|     |             |                 |          |                    | TGGCGGACAATTGCATGCGATTGCTATGTGTTG   | 399        | 2.00E-107 | 218/219(99%)   | LC422643.1                                      |
|     |             |                 |          |                    | AGGGAGAAATAGGTGGCATGTTGGGCTTGTAGAA  | 399        | 2.00E-107 | 218/219(99%)   | MF358963.1                                      |
|     |             |                 |          |                    | AGGCATGCCGTAGCGCTATTTCCCGCTATTT     | 399        | 2.00E-107 | 218/219(99%)   | HQ721819.1                                      |
|     |             |                 |          |                    | CGTAACAACGGTGTCCATTTGGCGTCTACGCTT   | 383        | 2.00E-102 | 215/219(98%)   | AJ000895.1                                      |
| 2   | D27         | As              | As       | As-F, As-R         | GGTGATGTAATAGCAGTCGGCGGTTTCTTTTTTTT | 390        | 1.00E-104 | 215/217(99%)   | AJ000895.1                                      |
|     |             |                 |          |                    | TGGCGGACAATTGCATGCGATTGCTATGTGTTG   | 385        | 5.00E-103 | 216/219(99%)   | MK849920.1                                      |
|     |             |                 |          |                    | AGGGAGAAATAGGTGGCATGTTGGGCTTGTAGAA  | 385        | 5.00E-103 | 216/219(99%)   | LC422643.1                                      |
|     |             |                 |          |                    | AGGCATGGTAGCGCTATTTCCCGCTATTTGTA    | 385        | 5.00E-103 | 216/219(99%)   | MF358963.1                                      |
|     |             |                 |          |                    | ACAACGGTGTCCATTTGGCGTCTACGCTTACC    | 385        | 5.00E-103 | 216/219(99%)   | HQ721819.1                                      |
| 3   | D21         | As              | As       | As-F, As-R         | GGTGATGTAATAGCAGTCGGCGGTTTCTTTTTTTT | 392        | 3.00E-105 | 215/217(99%)   | AJ000895.1                                      |
|     |             |                 |          |                    | TGGCGGACAATTGCATGCGATTGCTATGTGTTG   | 387        | 1.00E-103 | 216/219(99%)   | MK849920.1                                      |
|     |             |                 |          |                    | CGGGAGAAATAGGTGGCATGTTGGGCTTGTAGAA  | 387        | 1.00E-103 | 216/219(99%)   | LC422643.1                                      |
|     |             |                 |          |                    | AGGCATGCGTAGCGCTATTTCCCGCTATTTG     | 387        | 1.00E-103 | 216/219(99%)   | MF358963.1                                      |
|     |             |                 |          |                    | TAACAACGGTGTCCATTTGGCGTCTACGCTTCA   | 387        | 1.00E-103 | 216/219(99%)   | HQ721819.1                                      |
| 4   | D25         | As              | As       | As-F, As-R         | GGTGATGTAATAGCAGTCGGCGGTTTCTTTTTTTT | 392        | 3.00E-105 | 215/217(99%)   | AJ000895.1                                      |
|     |             |                 |          |                    | TGGCGGACAATTGCATGCGATTGCTATGTGTTG   | 387        | 1.00E-103 | 216/219(99%)   | MK849920.1                                      |
|     |             |                 |          |                    | AGGGAGAAATAGGTGGCATGTTGGGCTTGTAGAA  | 387        | 1.00E-103 | 216/219(99%)   | LC422643.1                                      |
|     |             |                 |          |                    | AGGCATGCGTAGCGCTATTTCCCGCTATTTG     | 387        | 1.00E-103 | 216/219(99%)   | MF358963.1                                      |
|     |             |                 |          |                    | TAACAACGGTGTCCATTTGGCGTCTACGCTTCA   | 387        | 1.00E-103 | 216/219(99%)   | HQ721819.1                                      |
| 5   | D53         | NF              | As+Ss+Hw | As-F, As-R         | GGTGATGTAATAGCAGTCGGCGGTTTCTTTTTTTT | 387        | 1.00E-103 | 214/217(99%)   | AJ000895.1                                      |
|     |             |                 |          |                    | TGGCGGACAATTGCATGCGATTGCTATGTGTTG   | 381        | 6.00E-102 | 215/219(98%)   | MK849920.1                                      |
|     |             |                 |          |                    | AGGGAGAAATAGGTGGCATGTTGGGCTTGTAGAA  | 381        | 6.00E-102 | 215/219(98%)   | LC422643.1                                      |
|     |             |                 |          |                    | AGGCATGCGTAGCGCTATTTCCCGCTATTTG     | 381        | 6.00E-102 | 215/219(98%)   | MF358963.1                                      |
|     |             |                 |          |                    | TAACAACGGTGTCCATTTGGCGTCTACGCTTCA   | 381        | 6.00E-102 | 215/219(98%)   | HQ721819.1                                      |
| 6   | D56         | NF              | As+Ss    | As-F, As-R         | GGTGATGTAATAGCAGTCGGCGGTTTCTTTTTTTT | 390        | 1.00E-104 | 215/217(99%)   | AJ000895.1                                      |
|     |             |                 |          |                    | TGGCGGACAATTGCATGCGATTGCTATGTGTTG   | 385        | 5.00E-103 | 216/219(99%)   | MK849920.1                                      |
|     |             |                 |          |                    | AGGGAGAAATAGGTGGCATGTTGGGCTTGTAGAA  | 385        | 5.00E-103 | 216/219(99%)   | LC422643.1                                      |
|     |             |                 |          |                    | AGGCATGCGTAGCGCTATTTCCCGCTATTTG     | 385        | 5.00E-103 | 216/219(99%)   | MF358963.1                                      |
|     |             |                 |          |                    | TAACAACGGTGTCCATTTGGCGTCTACGCTTCA   | 385        | 5.00E-103 | 216/219(99%)   | HQ721819.1                                      |
| 7   | BK75        | Hw              | As+Hw    | As-F, As-R         | GGTGATGTAATAGCAGTCGGCGGTTTCTTTTTTTT | 390        | 1.00E-104 | 215/217(99%)   | AJ000895.1                                      |
|     |             |                 |          |                    | TGGCGGACAATTGCATGCGATTGCTATGTGTTG   | 381        | 6.00E-102 | 215/219(98%)   | MK849920.1                                      |
|     |             |                 |          |                    | AGGGAGAAATAGGTGGCATGTTGGGCTTGTAGAA  | 381        | 6.00E-102 | 215/219(98%)   | LC422643.1                                      |
|     |             |                 |          |                    | AGGCATGCGTAGCGCTATTTCCCGCTATTTG     | 381        | 6.00E-102 | 215/219(98%)   | MF358963.1                                      |
|     |             |                 |          |                    | TAACAACGGTGTCCATTTGGCGTCTACGCTTCA   | 381        | 6.00E-102 | 215/219(98%)   | HQ721819.1                                      |
| 8   | Hw-T7       | plasmid control |          | T7-F, T7-R         | AGCATTGCTTGAATGCCGCCTCAATTTTGTATTG  | 881        | 0.0       | 477/477 (100%) | KM891738.1                                      |
|     |             |                 |          |                    | GTGGTTAGACACACACATAAATTGTGTGGTGT    | 881        | 0.0       | 477/477 (100%) | LC036565.1                                      |
|     |             |                 |          |                    | GGTACCTGTTCTTGTATCAGGAAACCTTAATGAT  | 881        | 0.0       | 477/477 (100%) | LC036563.1                                      |
|     |             |                 |          |                    | CCTTCACATGTTAACCAATAATGCGCGCTACGTG  | 876        | 0.0       | 476/477 (99%)  | LC088287.1                                      |
|     |             |                 |          |                    | TTATGGTGGATGGGACAATATGTGTGGACGCCAA  | 876        | 0.0       | 476/477 (99%)  | AB793527.1                                      |
| 9   | 22          | NF              | Hw+Ss    | Hw-F,Hw-R          | AGCATTGCTTGAATGCCGCCTCAATTTTGTATTG  | 881        | 0.0       | 477/477 (100%) | LC088287.1                                      |
|     |             |                 |          |                    | GTGGTTGGACACACACATAAATTGTGTGGTGT    | 881        | 0.0       | 477/477 (100%) | AB793527.1                                      |
|     |             |                 |          |                    | GGTACCTGTTCTTGTATCAGGAAACCTTAATGAT  | 876        | 0.0       | 476/477 (99%)  | KM891738.1                                      |
|     |             |                 |          |                    | CCTTCACATGTTAACCAATAATGCGCGCTACGTG  | 876        | 0.0       | 476/477 (99%)  | LC036565.1                                      |
|     |             |                 |          |                    | TTATGGTGGATGGGACAATATGTGTGGACGCCAA  | 876        | 0.0       | 476/477 (99%)  | LC036563.1                                      |
| 10  | D53         | NF              | As+Hw+Ss | Hw-F,Hw-R          | AGCATTGCTTGAATGCCGCCTCAATTTTGTATTG  | 881        | 0.0       | 477/477 (100%) | LC088287.1                                      |
|     |             |                 |          |                    | GTGGTTGGACACACACATAAATTGTGTGGTGT    | 881        | 0.0       | 477/477 (100%) | AB793527.1                                      |
|     |             |                 |          |                    | GGTACCTGTTCTTGTATCAGGAAACCTTAATGAT  | 876        | 0.0       | 476/477 (99%)  | KM891738.1                                      |
|     |             |                 |          |                    | CCTTCACATGTTAACCAATAATGCGCGCTACGTG  | 876        | 0.0       | 476/477 (99%)  | LC036565.1                                      |
|     |             |                 |          |                    | TTATGGTGGATGGGACAATATGTGTGGACGCCAA  | 876        | 0.0       | 476/477 (99%)  | LC036563.1                                      |
| 11  | D64         | NF              | As+Hw+Ss | Hw-F,Hw-R          | AGCATTGCTTGAATGCCGCCTCAATTTTGTATTG  | 881        | 0.0       | 477/477 (100%) | LC088287.1                                      |
|     |             |                 |          |                    | GTGGTTAGACACACACATAAATTGTGTGGTGT    | 881        | 0.0       | 477/477 (100%) | LC036565.1                                      |
|     |             |                 |          |                    | GGTACCTGTTCTTGTATCAGGAAACCTTAATGAT  | 881        | 0.0       | 477/477 (100%) | LC036563.1                                      |
|     |             |                 |          |                    | CCTTCACATGTTAACCAATAATGCGCGCTACGTG  | 876        | 0.0       | 476/477 (99%)  | LC088287.1                                      |
|     |             |                 |          |                    | TTATGGTGGATGGGACAATATGTGTGGACGCCAA  | 876        | 0.0       | 476/477 (99%)  | AB793527.1                                      |
| 12  | D90         | As+Hw           | As+Hw    | Hw-F,Hw-R          | AGCATTGCTTGAATGCCGCCTCAATTTTGTATTG  | 881        | 0.0       | 477/477 (100%) | LC088287.1                                      |
|     |             |                 |          |                    | GTGGTTGGACACACACATAAATTGTGTGGTGT    | 881        | 0.0       | 477/477 (100%) | AB793527.1                                      |
|     |             |                 |          |                    | GGTACCTGTTCTTGTATCAGGAAACCTTAATGAT  | 876        | 0.0       | 476/477 (99%)  | KM891738.1                                      |
|     |             |                 |          |                    | CCTTCACATGTTAACCAATAATGCGCGCTACGTG  | 876        | 0.0       | 476/477 (99%)  | LC036565.1                                      |
|     |             |                 |          |                    | TTATGGTGGATGGGACAATATGTGTGGACGCCAA  | 876        | 0.0       | 476/477 (99%)  | LC036563.1                                      |

|    |        |                 |       |            |                                                                                                                                                                                                                                                                                                            |     |        |                |                |
|----|--------|-----------------|-------|------------|------------------------------------------------------------------------------------------------------------------------------------------------------------------------------------------------------------------------------------------------------------------------------------------------------------|-----|--------|----------------|----------------|
|    |        |                 |       |            | CACAAAATATTAACITTTTACATTTGATGTTTGCAG<br>ATGATCGTGACTTCATCTTAGTCGTACATTAGAC<br>TCCACTAGCTTCAGCCATCGATCCCTCCATTCCG                                                                                                                                                                                           | 876 | 0.0    | 476/477 (99%)  | LC036563.1     |
|    |        |                 |       |            |                                                                                                                                                                                                                                                                                                            | 876 | 0.0    | 476/477 (99%)  | AF217891.1     |
| 13 | D97    | As+H<br>w       | As+Hw | Hw-F,Hw-R  | AGCATTGCTTGAATGCCGCCTCAATTTTGTATTG<br>GTGGTTGGACACACACATAACTTGTGTGGTGT<br>GGTACCTGTTCTTGTGATCAGGAAACCTTAATGAT<br>CCTTCACATGTTAACCAATAATGCGCGCTACGTG<br>TTATGGTGGATGGACAATATGTGGACGCCAA<br>CACAAAATATTAACITTTTACATTTGATGTTTGCAG<br>ATGATCGTGACTTCATCTTAGTCGTACATTAGAC<br>TCCACTAGCTTCAGCCATCGATCCCTCCATTCCG | 881 | 0.0    | 477/477 (100%) | LC088287.1     |
|    |        |                 |       |            |                                                                                                                                                                                                                                                                                                            | 881 | 0.0    | 477/477 (100%) | AB793527.1     |
|    |        |                 |       |            |                                                                                                                                                                                                                                                                                                            | 876 | 0.0    | 476/477 (99%)  | KM891738.1     |
|    |        |                 |       |            |                                                                                                                                                                                                                                                                                                            | 876 | 0.0    | 476/477 (99%)  | LC036565.1     |
|    |        |                 |       |            |                                                                                                                                                                                                                                                                                                            | 876 | 0.0    | 476/477 (99%)  | LC036563.1     |
|    |        |                 |       |            |                                                                                                                                                                                                                                                                                                            | 876 | 0.0    | 476/477 (99%)  | AF217891.1     |
|    |        |                 |       |            |                                                                                                                                                                                                                                                                                                            | 876 | 0.0    | 476/477 (99%)  | AF217891.1     |
| 14 | Ss4-T7 | plasmid control |       | T7-F, T7-R | GAATCCAAGTAAACGTAAGTCATTAGCTTACATT<br>GATTACGTCCCTGCCCTTTGTACACACCCGCCGT<br>CGGTGCCCGGAACTGAGCAATATCCAGAGGCA                                                                                                                                                                                               | 176 | 1.E-40 | 100/102 (98%)  | M84229.1       |
|    |        |                 |       |            |                                                                                                                                                                                                                                                                                                            | 172 | 2.E-39 | 99/102 (97%)   | AF036605.1     |
|    |        |                 |       |            |                                                                                                                                                                                                                                                                                                            | 171 | 6.E-39 | 99/102 (97%)   | XM_024646606.1 |
|    |        |                 |       |            |                                                                                                                                                                                                                                                                                                            | 171 | 6.E-39 | 99/102 (97%)   | LC038066.1     |
|    |        |                 |       |            |                                                                                                                                                                                                                                                                                                            | 171 | 6.E-39 | 99/102 (97%)   | LM524975.1     |
|    |        |                 |       |            |                                                                                                                                                                                                                                                                                                            | 171 | 6.E-39 | 99/102 (97%)   | LM524969.1     |
|    |        |                 |       |            |                                                                                                                                                                                                                                                                                                            | 171 | 6.E-39 | 99/102 (97%)   | AB923889.1     |
| 15 | 6      | NF              | Ss    | Ss-F, Ss-R | GAATCCAAGTAAACGTAAGTCATTAGCTTACATT<br>GATTACGTCCCTGCCCTTTGTACACACCCGCCGT<br>CGCTGCCCGGAACTGAGCAATATCCAGAGGCA                                                                                                                                                                                               | 187 | 5.E-44 | 101/101 (100%) | M84229.1       |
|    |        |                 |       |            |                                                                                                                                                                                                                                                                                                            | 182 | 3.E-42 | 100/101 (99%)  | XM_024646606.1 |
|    |        |                 |       |            |                                                                                                                                                                                                                                                                                                            | 182 | 3.E-42 | 100/101 (99%)  | LC038066.1     |
|    |        |                 |       |            |                                                                                                                                                                                                                                                                                                            | 182 | 3.E-42 | 100/101 (99%)  | LM524975.1     |
|    |        |                 |       |            |                                                                                                                                                                                                                                                                                                            | 182 | 3.E-42 | 100/101 (99%)  | LM524969.1     |
|    |        |                 |       |            |                                                                                                                                                                                                                                                                                                            | 182 | 3.E-42 | 100/101 (99%)  | AB923889.1     |
|    |        |                 |       |            |                                                                                                                                                                                                                                                                                                            | 182 | 3.E-42 | 100/101 (99%)  | AB923888.1     |
| 16 | 3      | NF              | Ss    | Ss-F, Ss-R | GAATCCAAGTAAACGTAAGTCATTAGCTTACATT<br>GATTACGTCCCTGCCCTTTGTACACACCCGCCGT<br>CGCTGCCCGGAACTGAGCAATATCCAGAGGCA                                                                                                                                                                                               | 187 | 5.E-44 | 101/101 (100%) | M84229.1       |
|    |        |                 |       |            |                                                                                                                                                                                                                                                                                                            | 182 | 3.E-42 | 100/101 (99%)  | XM_024646606.1 |
|    |        |                 |       |            |                                                                                                                                                                                                                                                                                                            | 182 | 3.E-42 | 100/101 (99%)  | LC038066.1     |
|    |        |                 |       |            |                                                                                                                                                                                                                                                                                                            | 182 | 3.E-42 | 100/101 (99%)  | LM524975.1     |
|    |        |                 |       |            |                                                                                                                                                                                                                                                                                                            | 182 | 3.E-42 | 100/101 (99%)  | LM524969.1     |
|    |        |                 |       |            |                                                                                                                                                                                                                                                                                                            | 182 | 3.E-42 | 100/101 (99%)  | AB923889.1     |
|    |        |                 |       |            |                                                                                                                                                                                                                                                                                                            | 182 | 3.E-42 | 100/101 (99%)  | AB923888.1     |
| 17 | 15     | NF              | Ss    | Ss-F, Ss-R | GAATCCAAGTAAACGTAAGTCATTAGCTTACATT<br>GATTACGTCCCTGCCCTTTGTACACACCCGCCGT<br>CGCTGCCCGGAACTGAGCAATATCCAGAGGCA                                                                                                                                                                                               | 187 | 5.E-44 | 101/101 (100%) | M84229.1       |
|    |        |                 |       |            |                                                                                                                                                                                                                                                                                                            | 182 | 3.E-42 | 100/101 (99%)  | XM_024646606.1 |
|    |        |                 |       |            |                                                                                                                                                                                                                                                                                                            | 182 | 3.E-42 | 100/101 (99%)  | LC038066.1     |
|    |        |                 |       |            |                                                                                                                                                                                                                                                                                                            | 182 | 3.E-42 | 100/101 (99%)  | LM524975.1     |
|    |        |                 |       |            |                                                                                                                                                                                                                                                                                                            | 182 | 3.E-42 | 100/101 (99%)  | LM524969.1     |
|    |        |                 |       |            |                                                                                                                                                                                                                                                                                                            | 182 | 3.E-42 | 100/101 (99%)  | AB923889.1     |
|    |        |                 |       |            |                                                                                                                                                                                                                                                                                                            | 182 | 3.E-42 | 100/101 (99%)  | AB923888.1     |
| 18 | 8      | NF              | Ss    | Ss-F, Ss-R | GAATCCAAGTAAACGTAAGTCATTAGCTTACATT<br>GATTACGTCCCTGCCCTTTGTACACACCCGCCGT<br>GCTGCCCGGAACTGAGCAATATCCAGAGGCA                                                                                                                                                                                                | 180 | 9.E-42 | 100/101 (99%)  | M84229.1       |
|    |        |                 |       |            |                                                                                                                                                                                                                                                                                                            | 174 | 4.E-40 | 99/101 (98%)   | XM_024646606.1 |
|    |        |                 |       |            |                                                                                                                                                                                                                                                                                                            | 174 | 4.E-40 | 99/101 (98%)   | LC038066.1     |
|    |        |                 |       |            |                                                                                                                                                                                                                                                                                                            | 174 | 4.E-40 | 99/101 (98%)   | LM524975.1     |
|    |        |                 |       |            |                                                                                                                                                                                                                                                                                                            | 174 | 4.E-40 | 99/101 (98%)   | LM524969.1     |
|    |        |                 |       |            |                                                                                                                                                                                                                                                                                                            | 174 | 4.E-40 | 99/101 (98%)   | AB923889.1     |
|    |        |                 |       |            |                                                                                                                                                                                                                                                                                                            | 174 | 4.E-40 | 99/101 (98%)   | AB923888.1     |
| 19 | 27     | Ss              | Ss    | Ss-F, Ss-R | GAATCCAAGTAAACGTAAGTCATTAGCTTACATT<br>GATTACGTCCCTGCCCTTTGTACACACCCGCCGT<br>CGCTGCCCGGAACTGAGCAATATCCAGAGGCA                                                                                                                                                                                               | 187 | 5.E-44 | 101/101 (100%) | M84229.1       |
|    |        |                 |       |            |                                                                                                                                                                                                                                                                                                            | 182 | 3.E-42 | 100/101 (99%)  | XM_024646606.1 |
|    |        |                 |       |            |                                                                                                                                                                                                                                                                                                            | 182 | 3.E-42 | 100/101 (99%)  | LC038066.1     |
|    |        |                 |       |            |                                                                                                                                                                                                                                                                                                            | 182 | 3.E-42 | 100/101 (99%)  | LM524975.1     |
|    |        |                 |       |            |                                                                                                                                                                                                                                                                                                            | 182 | 3.E-42 | 100/101 (99%)  | LM524969.1     |
|    |        |                 |       |            |                                                                                                                                                                                                                                                                                                            | 182 | 3.E-42 | 100/101 (99%)  | AB923889.1     |
|    |        |                 |       |            |                                                                                                                                                                                                                                                                                                            | 182 | 3.E-42 | 100/101 (99%)  | AB923888.1     |
| 20 | 33     | Ss              | Ss    | Ss-F, Ss-R | GAATCCAAGTAAACGTAAGTCATTAGCTTACATT<br>GATTACGTCCCTGCCCTTTGTAAACCCGCCGT<br>GCTGCCCGGAACTGAGCAATATCCAGAGGCA                                                                                                                                                                                                  | 180 | 9.E-42 | 100/101 (99%)  | M84229.1       |
|    |        |                 |       |            |                                                                                                                                                                                                                                                                                                            | 174 | 4.E-40 | 99/101 (98%)   | XM_024646606.1 |
|    |        |                 |       |            |                                                                                                                                                                                                                                                                                                            | 174 | 4.E-40 | 99/101 (98%)   | LC038066.1     |
|    |        |                 |       |            |                                                                                                                                                                                                                                                                                                            | 174 | 4.E-40 | 99/101 (98%)   | LM524975.1     |
|    |        |                 |       |            |                                                                                                                                                                                                                                                                                                            | 174 | 4.E-40 | 99/101 (98%)   | LM524969.1     |
|    |        |                 |       |            |                                                                                                                                                                                                                                                                                                            | 174 | 4.E-40 | 99/101 (98%)   | AB923889.1     |
|    |        |                 |       |            |                                                                                                                                                                                                                                                                                                            | 174 | 4.E-40 | 99/101 (98%)   | AB923888.1     |
| 21 | 28     | Ss              | Ss    | Ss-F, Ss-R | GAATCCAAGTAAACGTAAGTCATTAGCTTACATT<br>GATTACGTCCCTGCCCTTTGTACACACCCGCCGT<br>CGCTGCCCGGAACTGAGCAATATCCAGAGCA                                                                                                                                                                                                | 182 | 2.E-42 | 98/98 (100%)   | M84229.1       |
|    |        |                 |       |            |                                                                                                                                                                                                                                                                                                            | 176 | 1.E-40 | 97/98 (99%)    | XM_024646606.1 |
|    |        |                 |       |            |                                                                                                                                                                                                                                                                                                            | 176 | 1.E-40 | 97/98 (99%)    | LC038066.1     |
|    |        |                 |       |            |                                                                                                                                                                                                                                                                                                            | 176 | 1.E-40 | 97/98 (99%)    | LM524975.1     |
|    |        |                 |       |            |                                                                                                                                                                                                                                                                                                            | 176 | 1.E-40 | 97/98 (99%)    | LM524969.1     |
|    |        |                 |       |            |                                                                                                                                                                                                                                                                                                            | 176 | 1.E-40 | 97/98 (99%)    | AB923889.1     |
|    |        |                 |       |            |                                                                                                                                                                                                                                                                                                            | 176 | 1.E-40 | 97/98 (99%)    | AB923888.1     |
| 22 | 44     | Hw              | Ss    | Ss-F, Ss-R | GAATCCAAGTAAACGTAAGTCATTAGCTTACATT<br>GATTACGTCCCTGCCCTTTGTACACACCCGCCGT<br>CGCTGCCCGGAACTGAGCAATATCCAGAGGCA                                                                                                                                                                                               | 187 | 5.E-44 | 101/101 (100%) | M84229.1       |
|    |        |                 |       |            |                                                                                                                                                                                                                                                                                                            | 182 | 3.E-42 | 100/101 (99%)  | XM_024646606.1 |
|    |        |                 |       |            |                                                                                                                                                                                                                                                                                                            | 182 | 3.E-42 | 100/101 (99%)  | LC038066.1     |
|    |        |                 |       |            |                                                                                                                                                                                                                                                                                                            | 182 | 3.E-42 | 100/101 (99%)  | LM524975.1     |
|    |        |                 |       |            |                                                                                                                                                                                                                                                                                                            | 182 | 3.E-42 | 100/101 (99%)  | LM524969.1     |
|    |        |                 |       |            |                                                                                                                                                                                                                                                                                                            | 182 | 3.E-42 | 100/101 (99%)  | AB923889.1     |
|    |        |                 |       |            |                                                                                                                                                                                                                                                                                                            | 182 | 3.E-42 | 100/101 (99%)  | AB923888.1     |

|    |     |    |          |            |                                                                                                              |     |        |                |                |
|----|-----|----|----------|------------|--------------------------------------------------------------------------------------------------------------|-----|--------|----------------|----------------|
| 23 | H19 | Hw | Ss       | Ss-F, Ss-R | GAATTCCAAGTAAACGTAAGTCATTAGCTTACATT<br>GATTACGTCCTGCCCTTTGTACACACCGCCCGT<br>CGCTGCCCGGAACTGAGCAATATCCAGAGGCA | 187 | 5.E-44 | 101/101 (100%) | M84229.1       |
|    |     |    |          |            |                                                                                                              | 182 | 3.E-42 | 100/101 (99%)  | XM_024646606.1 |
|    |     |    |          |            |                                                                                                              | 182 | 3.E-42 | 100/101 (99%)  | LC038066.1     |
|    |     |    |          |            |                                                                                                              | 182 | 3.E-42 | 100/101 (99%)  | LM524975.1     |
|    |     |    |          |            |                                                                                                              | 182 | 3.E-42 | 100/101 (99%)  | LM524969.1     |
|    |     |    |          |            |                                                                                                              | 182 | 3.E-42 | 100/101 (99%)  | AB923889.1     |
| 24 | D63 | NF | As+Ss    | Ss-F, Ss-R | GAATTCCAAGTAAACGTAAGTCATTAGCTTACATT<br>GATTACGTCCTGCCCTTTGTACACACCGCCCGT<br>CGCTGCCCGGAACTGAGCAATATCCAGAGGCA | 187 | 5.E-44 | 101/101 (100%) | M84229.1       |
|    |     |    |          |            |                                                                                                              | 182 | 3.E-42 | 100/101 (99%)  | XM_024646606.1 |
|    |     |    |          |            |                                                                                                              | 182 | 3.E-42 | 100/101 (99%)  | LC038066.1     |
|    |     |    |          |            |                                                                                                              | 182 | 3.E-42 | 100/101 (99%)  | LM524975.1     |
|    |     |    |          |            |                                                                                                              | 182 | 3.E-42 | 100/101 (99%)  | LM524969.1     |
|    |     |    |          |            |                                                                                                              | 182 | 3.E-42 | 100/101 (99%)  | AB923889.1     |
| 25 | D73 | NF | As+Ss    | Ss-F, Ss-R | GAATTCCAAGTAAACGTAAGTCATTAGCTTACATT<br>GATTACGTCCTGCCCTTTGTACACACCGCCCGT<br>CGCTGCCCGGAACTGAGCAATATCCAGAGGCA | 187 | 5.E-44 | 101/101 (100%) | M84229.1       |
|    |     |    |          |            |                                                                                                              | 182 | 3.E-42 | 100/101 (99%)  | XM_024646606.1 |
|    |     |    |          |            |                                                                                                              | 182 | 3.E-42 | 100/101 (99%)  | LC038066.1     |
|    |     |    |          |            |                                                                                                              | 182 | 3.E-42 | 100/101 (99%)  | LM524975.1     |
|    |     |    |          |            |                                                                                                              | 182 | 3.E-42 | 100/101 (99%)  | LM524969.1     |
|    |     |    |          |            |                                                                                                              | 182 | 3.E-42 | 100/101 (99%)  | AB923889.1     |
| 26 | D98 | As | As+Ss    | Ss-F, Ss-R | GAATTCCAAGTAAACGTAAGTCATTAGCTTACATT<br>GATTACGTCCTGCCCTTTGTACACACCGCCCGT<br>CGCTGCCCGGAACTGAGCAATATCCAGAGGCA | 187 | 5.E-44 | 101/101 (100%) | M84229.1       |
|    |     |    |          |            |                                                                                                              | 182 | 3.E-42 | 100/101 (99%)  | XM_024646606.1 |
|    |     |    |          |            |                                                                                                              | 182 | 3.E-42 | 100/101 (99%)  | LC038066.1     |
|    |     |    |          |            |                                                                                                              | 182 | 3.E-42 | 100/101 (99%)  | LM524975.1     |
|    |     |    |          |            |                                                                                                              | 182 | 3.E-42 | 100/101 (99%)  | LM524969.1     |
|    |     |    |          |            |                                                                                                              | 182 | 3.E-42 | 100/101 (99%)  | AB923889.1     |
| 27 | 22  | NF | Hw+Ss    | Ss-F, Ss-R | GAATTCCAAGTAAACGTAAGTCATTAGCTTACATT<br>GATTACGTCCTGCCCTTTGTACACACCGCCCGT<br>CGCTGCCCGGAACTGAGCAATATCCAGAGGCA | 187 | 5.E-44 | 101/101 (100%) | M84229.1       |
|    |     |    |          |            |                                                                                                              | 182 | 3.E-42 | 100/101 (99%)  | XM_024646606.1 |
|    |     |    |          |            |                                                                                                              | 182 | 3.E-42 | 100/101 (99%)  | LC038066.1     |
|    |     |    |          |            |                                                                                                              | 182 | 3.E-42 | 100/101 (99%)  | LM524975.1     |
|    |     |    |          |            |                                                                                                              | 182 | 3.E-42 | 100/101 (99%)  | LM524969.1     |
|    |     |    |          |            |                                                                                                              | 182 | 3.E-42 | 100/101 (99%)  | AB923889.1     |
| 28 | D53 | NF | As+Hw+Ss | Ss-F, Ss-R | GAATTCCAAGTAAACGTAAGTCATTAGCTTACATT<br>GATTACGCACTGCCCTTTGTACACACCGCCCGT<br>GCTGCCCGGAACTGAGCAATATCCAGAGGCA  | 174 | 4.E-40 | 99/101 (98%)   | M84229.1       |
|    |     |    |          |            |                                                                                                              | 169 | 2.E-38 | 98/101 (97%)   | XM_024646606.1 |
|    |     |    |          |            |                                                                                                              | 169 | 2.E-38 | 98/101 (97%)   | LC038066.1     |
|    |     |    |          |            |                                                                                                              | 169 | 2.E-38 | 98/101 (97%)   | LM524975.1     |
|    |     |    |          |            |                                                                                                              | 169 | 2.E-38 | 98/101 (97%)   | LM524969.1     |
|    |     |    |          |            |                                                                                                              | 169 | 2.E-38 | 98/101 (97%)   | AB923889.1     |

FECT: Formalin ethyl acetate concentration technique

As: Ascaris lumbricoides

Hw: Hookworm

Ss: Strongyloides stercoralis

NF: Not found
